# Supplementary material for: A Comprehensive Pan-Cancer Analysis of the Potential Biological Functions and Prognosis Values of RICTOR
Source: Genes (Basel). 2023 Jun 16;14(6):1280. doi: 10.3390/genes14061280 (PMC10298440; doi:10.3390/genes14061280)
Supplement: Supplementary file 1 [file genes-14-01280-s001.zip › supp_table_RICTOR.xlsx]

## Sheet: Table S1
Supplementary Table 1. TCGA and TARGET datasets used in this study
Abbreviation	Cancer
TCGA-ACC	Adrenocortical carcinoma
TCGA-BLCA	Bladder Urothelial Carcinoma
TCGA-BRCA	Breast invasive carcinoma
TCGA-CESC	Cervical squamous cell carcinoma and endocervical adenocarcinoma
TCGA-CHOL	Cholangiocarcinoma
TCGA-COAD	Colon adenocarcinoma
TCGA-COADREAD	Colon adenocarcinoma/Rectum adenocarcinoma Esophageal carcinoma
TCGA-DLBC	Lymphoid Neoplasm Diffuse Large B-cell Lymphoma
TCGA-ESCA	Esophageal carcinoma
TCGA-FPPP	FFPE Pilot Phase II
TCGA-GBM	Glioblastoma multiforme
TCGA-GBMLGG	Glioma
TCGA-HNSC	Head and Neck squamous cell carcinoma
TCGA-KICH	Kidney Chromophobe
TCGA-KIPAN	Pan-kidney cohort (KICH+KIRC+KIRP)
TCGA-KIRC	Kidney renal clear cell carcinoma
TCGA-KIRP	Kidney renal papillary cell carcinoma
TCGA-LAML	Acute Myeloid Leukemia
TCGA-LGG	Brain Lower Grade Glioma
TCGA-LIHC	Liver hepatocellular carcinoma
TCGA-LUAD	Lung adenocarcinoma
TCGA-LUSC	Lung squamous cell carcinoma
TCGA-MESO	Mesothelioma
TCGA-OV	Ovarian serous cystadenocarcinoma
TCGA-PAAD	Pancreatic adenocarcinoma
TCGA-PCPG	Pheochromocytoma and Paraganglioma
TCGA-PRAD	Prostate adenocarcinoma
TCGA-READ	Rectum adenocarcinoma
TCGA-SARC	Sarcoma
TCGA-STAD	Stomach adenocarcinoma
TCGA-SKCM	Skin Cutaneous Melanoma
TCGA-STES	Stomach and Esophageal carcinoma
TCGA-TGCT	Testicular Germ Cell Tumors
TCGA-THCA	Thyroid carcinoma
TCGA-THYM	Thymoma
TCGA-UCEC	Uterine Corpus Endometrial Carcinoma
TCGA-UCS	Uterine Carcinosarcoma
TCGA-UVM	Uveal Melanoma
TARGET-OS	Osteosarcoma
TARGET-ALL	Acute Lymphoblastic Leukemia
TARGET-NB	Neuroblastoma
TARGET-WT	High-Risk Wilms Tumor

## Sheet: Table S2
Supplementary Table 2. Top cell lines most sensitive to RICTOR knockout by CRISPR/Cas9
Depmap ID	CRISPR (DepMap Public 22Q4+Score, Chronos)	Cell Line Name	Primary Disease	Lineage	Lineage Subtype	Expression Public 22Q4	Mutations_Prioritized
ACH-000593	-1.33473	BC3C	Bladder Urothelial Carcinoma	Bladder/Urinary Tract	Bladder Urothelial Carcinoma	2.82171	Other
ACH-001688	-1.2905	UMRC7	Renal Cell Carcinoma	Kidney	Renal Cell Carcinoma	2.28392	Other
ACH-001795	-1.28693	94T778	Liposarcoma	Soft Tissue	Liposarcoma	2.58015	Other
ACH-002189	-1.27521	RCCFG2	Renal Cell Carcinoma	Kidney	Renal Cell Carcinoma		Other
ACH-000960	-1.26409	REH	B-Lymphoblastic Leukemia/Lymphoma	Lymphoid	B-Lymphoblastic Leukemia/Lymphoma	3.5509	Other
ACH-000550	-1.23632	IGR39	Melanoma	Skin	Melanoma	3.46728	Other
ACH-002687	-1.21211	WM3772F	Ocular Melanoma	Eye	Ocular Melanoma	1.90304	Other
ACH-000017	-1.19606	SKBR3	Invasive Breast Carcinoma	Breast	Invasive Breast Carcinoma	2.09424	Other
ACH-000847	-1.18567	HGC27	Esophagogastric Adenocarcinoma	Esophagus/Stomach	Esophagogastric Adenocarcinoma	2.06005	Other
ACH-000315	-1.17401	KARPAS422	Non-Hodgkin Lymphoma	Lymphoid	Non-Hodgkin Lymphoma	3.76022	Other
ACH-001050	-1.16958	CW9019	Rhabdomyosarcoma	Soft Tissue	Rhabdomyosarcoma	1.848	Other
ACH-001563	-1.16754	MM127	Melanoma	Skin	Melanoma	2.86987	Other
ACH-000288	-1.15862	BT549	Invasive Breast Carcinoma	Breast	Invasive Breast Carcinoma	3.16027	Other
ACH-000330	-1.14595	EFM19	Invasive Breast Carcinoma	Breast	Invasive Breast Carcinoma	3.18587	Other
ACH-002446	-1.14124	CCLFUPGI0005T	Esophagogastric Adenocarcinoma	Esophagus/Stomach	Esophagogastric Adenocarcinoma	1.73552	Other
ACH-001331	-1.0916	BICR10	Head and Neck Squamous Cell Carcinoma	Head and Neck	Head and Neck Squamous Cell Carcinoma		Other
ACH-000425	-1.08346	UACC62	Melanoma	Skin	Melanoma	2.24184	Other
ACH-001239	-1.0761	WM2664	Melanoma	Skin	Melanoma	3.01078	Other
ACH-000721	-1.0409	HMC18	Invasive Breast Carcinoma	Breast	Invasive Breast Carcinoma	3.34199	Other
ACH-000658	-1.03773	KMS18	Non-Hodgkin Lymphoma	Lymphoid	Non-Hodgkin Lymphoma		Other
ACH-001709	-1.03213	WSUNHL	Non-Hodgkin Lymphoma	Lymphoid	Non-Hodgkin Lymphoma	2.24793	Other
ACH-002257	-1.02217	KINGS1	Diffuse Glioma	CNS/Brain	Diffuse Glioma		Other
ACH-000541	-1.01741	KMS34	Non-Hodgkin Lymphoma	Lymphoid	Non-Hodgkin Lymphoma	3.42626	Other
ACH-000938	-1.01701	NALM6	B-Lymphoblastic Leukemia/Lymphoma	Lymphoid	B-Lymphoblastic Leukemia/Lymphoma	3.21723	Other
ACH-000363	-1.00844	SKMM2	Non-Hodgkin Lymphoma	Lymphoid	Non-Hodgkin Lymphoma	2.57531	Other
ACH-000365	-1.00281	SUDHL4	Non-Hodgkin Lymphoma	Lymphoid	Non-Hodgkin Lymphoma	2.28096	Other
ACH-000313	-0.996878	KMRC3	Renal Cell Carcinoma	Kidney	Renal Cell Carcinoma	3.76129	Other
ACH-002669	-0.994816	KP363T	Colorectal Adenocarcinoma	Bowel	Colorectal Adenocarcinoma	3.45286	Other
ACH-000011	-0.992612	253J	Bladder Urothelial Carcinoma	Bladder/Urinary Tract	Bladder Urothelial Carcinoma	2.62994	Other
ACH-000346	-0.988209	JVM3	Non-Hodgkin Lymphoma	Lymphoid	Non-Hodgkin Lymphoma	3.15381	Other
ACH-000684	-0.983241	KMRC1	Renal Cell Carcinoma	Kidney	Renal Cell Carcinoma	1.77821	Other
ACH-000098	-0.9625	GAMG	Diffuse Glioma	CNS/Brain	Diffuse Glioma	3.23113	Other
ACH-000097	-0.957837	ZR751	Invasive Breast Carcinoma	Breast	Invasive Breast Carcinoma	3.71699	Other
ACH-000248	-0.953995	AU565	Invasive Breast Carcinoma	Breast	Invasive Breast Carcinoma	2.81967	Other
ACH-001398	-0.948496	SW156	Renal Cell Carcinoma	Kidney	Renal Cell Carcinoma	3.25399	Other
ACH-000600	-0.940712	SLR26	Renal Cell Carcinoma	Kidney	Renal Cell Carcinoma	2.30743	Other
ACH-000922	-0.931313	RCHACV	B-Lymphoblastic Leukemia/Lymphoma	Lymphoid	B-Lymphoblastic Leukemia/Lymphoma	1.95233	Other
ACH-000591	-0.929634	LN235	Diffuse Glioma	CNS/Brain	Diffuse Glioma	2.52607	Other
ACH-001065	-0.921008	EVSAT	Invasive Breast Carcinoma	Breast	Invasive Breast Carcinoma		Other
ACH-000147	-0.914692	T47D	Invasive Breast Carcinoma	Breast	Invasive Breast Carcinoma	2.29866	Other
ACH-000977	-0.913214	LNCAPCLONEFGC	Prostate Adenocarcinoma	Prostate	Prostate Adenocarcinoma	2.1375	Other
ACH-000788	-0.912373	A2058	Melanoma	Skin	Melanoma	2.79909	Other
ACH-000914	-0.908638	HT	Non-Hodgkin Lymphoma	Lymphoid	Non-Hodgkin Lymphoma	2.70929	Other
ACH-000907	-0.908406	SNU349	Renal Cell Carcinoma	Kidney	Renal Cell Carcinoma	1.926	Other
ACH-000991	-0.907825	SNU81	Colorectal Adenocarcinoma	Bowel	Colorectal Adenocarcinoma	3.46728	Other
ACH-001556	-0.903882	MERO25	Pleural Mesothelioma	Pleura	Pleural Mesothelioma	3.87184	Other
ACH-000966	-0.903657	IGROV1	Ovarian Epithelial Tumor	Ovary/Fallopian Tube	Ovarian Epithelial Tumor	1.91839	Damaging
ACH-001544	-0.900585	KYAE1	Esophagogastric Adenocarcinoma	Esophagus/Stomach	Esophagogastric Adenocarcinoma		Other
ACH-001538	-0.899074	KKU213	Intraductal Papillary Neoplasm of the Bile Duct	Biliary Tract	Intraductal Papillary Neoplasm of the Bile Duct	4.58676	Other
ACH-000620	-0.896406	JHH1	Hepatocellular Carcinoma	Liver	Hepatocellular Carcinoma	2.66903	Other
ACH-001864	-0.895941	YSCCC	Intraductal Papillary Neoplasm of the Bile Duct	Biliary Tract	Intraductal Papillary Neoplasm of the Bile Duct	3.0635	Other
ACH-000231	-0.894385	KALS1	Diffuse Glioma	CNS/Brain	Diffuse Glioma	3.37016	Other
ACH-002710	-0.894117	MPNST724	Nerve Sheath Tumor	Peripheral Nervous System	Nerve Sheath Tumor	3.14568	Other
ACH-000926	-0.889277	HT55	Colorectal Adenocarcinoma	Bowel	Colorectal Adenocarcinoma	2.36737	Other
ACH-001128	-0.88676	MON	Embryonal Tumor	CNS/Brain	Embryonal Tumor	3.16832	Other
ACH-002834	-0.877829	PSS131R	Osteosarcoma	Bone	Osteosarcoma	2.9279	Other
ACH-001533	-0.87281	KARPAS1718	Non-Hodgkin Lymphoma	Lymphoid	Non-Hodgkin Lymphoma	2.1635	Other
ACH-000956	-0.863889	22RV1	Prostate Adenocarcinoma	Prostate	Prostate Adenocarcinoma	3.21878	Other
ACH-001145	-0.857949	OC316	Ovarian Epithelial Tumor	Ovary/Fallopian Tube	Ovarian Epithelial Tumor	2.51349	Other
ACH-000504	-0.856431	SNB75	Diffuse Glioma	CNS/Brain	Diffuse Glioma	2.8679	Other
ACH-000279	-0.855157	EWS502	Ewing Sarcoma	Bone	Ewing Sarcoma	2.57773	Other
ACH-000296	-0.85431	OUMS23	Colorectal Adenocarcinoma	Bowel	Colorectal Adenocarcinoma	2.94673	Other
ACH-000304	-0.852801	WM115	Melanoma	Skin	Melanoma	3.14241	Other
ACH-000646	-0.8477	OVMANA	Ovarian Epithelial Tumor	Ovary/Fallopian Tube	Ovarian Epithelial Tumor	2.10434	Other
ACH-000866	-0.84461	NCIH1048	Lung Neuroendocrine Tumor	Lung	Lung Neuroendocrine Tumor	3.17792	Other
ACH-002106	-0.84437	ES5	Ewing Sarcoma	Bone	Ewing Sarcoma		Other
ACH-000450	-0.838916	MELHO	Melanoma	Skin	Melanoma	2.37573	Other
ACH-001765	-0.833217	RH4	Rhabdomyosarcoma	Soft Tissue	Rhabdomyosarcoma	1.54102	Other
ACH-000763	-0.82178	MM1S	Non-Hodgkin Lymphoma	Lymphoid	Non-Hodgkin Lymphoma	2.93546	Other
ACH-000876	-0.820892	MDAMB415	Invasive Breast Carcinoma	Breast	Invasive Breast Carcinoma	2.9982	Other
ACH-000115	-0.820709	VCAP	Prostate Adenocarcinoma	Prostate	Prostate Adenocarcinoma	2.71589	Other non-conserving
ACH-000608	-0.815385	COV644	Ovarian Epithelial Tumor	Ovary/Fallopian Tube	Ovarian Epithelial Tumor	3.61706	Other
ACH-000398	-0.80623	RI1	Non-Hodgkin Lymphoma	Lymphoid	Non-Hodgkin Lymphoma	1.25096	Other
ACH-000395	-0.80395	NCIH520	Non-Small Cell Lung Cancer	Lung	Non-Small Cell Lung Cancer	2.88947	Other
ACH-001194	-0.801297	SKRC31	Renal Cell Carcinoma	Kidney	Renal Cell Carcinoma	3.61589	Other
ACH-000770	-0.801156	P31FUJ	Acute Myeloid Leukemia	Myeloid	Acute Myeloid Leukemia	3.14405	Other
ACH-000848	-0.794934	JHH7	Hepatocellular Carcinoma	Liver	Hepatocellular Carcinoma	3.10098	Other
ACH-000291	-0.782979	OV90	Ovarian Epithelial Tumor	Ovary/Fallopian Tube	Ovarian Epithelial Tumor	1.90689	Other
ACH-002018	-0.782089	OMM25	Ocular Melanoma	Eye	Ocular Melanoma	2.82782	Other
ACH-002016	-0.780784	MEL290	Ocular Melanoma	Eye	Ocular Melanoma	2.95977	Other
ACH-000719	-0.780458	RMGI	Ovarian Epithelial Tumor	Ovary/Fallopian Tube	Ovarian Epithelial Tumor	0.925999	Other
ACH-001407	-0.778668	UMUC13	Bladder Urothelial Carcinoma	Bladder/Urinary Tract	Bladder Urothelial Carcinoma	3.77505	Other
ACH-000668	-0.778539	HCC70	Invasive Breast Carcinoma	Breast	Invasive Breast Carcinoma	4.58376	Other
ACH-000101	-0.778325	KE37	Non-Hodgkin Lymphoma	Lymphoid	Non-Hodgkin Lymphoma	4.15218	Other
ACH-000507	-0.772213	KE39	Esophagogastric Adenocarcinoma	Esophagus/Stomach	Esophagogastric Adenocarcinoma	3.16993	Other
ACH-002014	-0.772199	MEL270	Ocular Melanoma	Eye	Ocular Melanoma	2.21101	Other
ACH-000371	-0.770766	RL	Non-Hodgkin Lymphoma	Lymphoid	Non-Hodgkin Lymphoma	2.38957	Other
ACH-000013	-0.76852	ONCODG1	Ovarian Epithelial Tumor	Ovary/Fallopian Tube	Ovarian Epithelial Tumor	2.70044	Other
ACH-000187	-0.767497	CORL311	Lung Neuroendocrine Tumor	Lung	Lung Neuroendocrine Tumor	3.21257	Other
ACH-002464	-0.764084	RPE1SS6	Non-Cancerous	Eye	Non-Cancerous	2.53854	Other
ACH-000148	-0.763773	HS578T	Invasive Breast Carcinoma	Breast	Invasive Breast Carcinoma	3.70819	Other
ACH-000667	-0.762486	HCC44	Non-Small Cell Lung Cancer	Lung	Non-Small Cell Lung Cancer	3.0072	Other
ACH-000323	-0.760494	42MGBA	Diffuse Glioma	CNS/Brain	Diffuse Glioma	2.79701	Other
ACH-000244	-0.7541	DKMG	Diffuse Glioma	CNS/Brain	Diffuse Glioma	3.5373	Other
ACH-000585	-0.748303	EPLC272H	Non-Small Cell Lung Cancer	Lung	Non-Small Cell Lung Cancer	3.27352	Other non-conserving
ACH-000722	-0.74614	SNUC1	Colorectal Adenocarcinoma	Bowel	Colorectal Adenocarcinoma	2.24489	Other non-conserving
ACH-000295	-0.745979	EM2	Myeloproliferative Neoplasms	Myeloid	Myeloproliferative Neoplasms	3.32769	Other
ACH-000222	-0.745617	ASPC1	Pancreatic Adenocarcinoma	Pancreas	Pancreatic Adenocarcinoma	4.11853	Other
ACH-002198	-0.74471	SCH	Extra Gonadal Germ Cell Tumor	Other	Extra Gonadal Germ Cell Tumor		Other
ACH-000257	-0.744289	CORL279	Lung Neuroendocrine Tumor	Lung	Lung Neuroendocrine Tumor	4.71205	Other
ACH-000007	-0.742766	LS513	Colorectal Adenocarcinoma	Bowel	Colorectal Adenocarcinoma	2.39232	Other
ACH-000649	-0.742608	786O	Renal Cell Carcinoma	Kidney	Renal Cell Carcinoma	3.82171	Other
ACH-001547	-0.73963	LO68	Pleural Mesothelioma	Pleura	Pleural Mesothelioma	2.38681	Other
ACH-000467	-0.735216	HCC56	Colorectal Adenocarcinoma	Bowel	Colorectal Adenocarcinoma	2.13422	Other
ACH-000660	-0.733255	SUDHL5	Non-Hodgkin Lymphoma	Lymphoid	Non-Hodgkin Lymphoma	3.16189	Other
ACH-001041	-0.729993	CHL1DM	Melanoma	Skin	Melanoma	3.11103	Other
ACH-000937	-0.724117	PF382	T-Lymphoblastic Leukemia/Lymphoma	Lymphoid	T-Lymphoblastic Leukemia/Lymphoma	4.42156	Other
ACH-000152	-0.722317	M059K	Diffuse Glioma	CNS/Brain	Diffuse Glioma	2.9782	Other
ACH-000547	-0.721665	HT1197	Bladder Urothelial Carcinoma	Bladder/Urinary Tract	Bladder Urothelial Carcinoma	2.65764	Other
ACH-001685	-0.716688	UHO1	Hodgkin Lymphoma	Lymphoid	Hodgkin Lymphoma	2.32193	Other
ACH-000545	-0.716642	VMCUB1	Bladder Urothelial Carcinoma	Bladder/Urinary Tract	Bladder Urothelial Carcinoma	3.75916	Other
ACH-001993	-0.716521	NALM16	B-Lymphoblastic Leukemia/Lymphoma	Lymphoid	B-Lymphoblastic Leukemia/Lymphoma	3.41954	Other
ACH-001848	-0.711125	ICC8	Intraductal Papillary Neoplasm of the Bile Duct	Biliary Tract	Intraductal Papillary Neoplasm of the Bile Duct	2.58736	Other
ACH-000143	-0.709927	HCC2429	Non-Small Cell Lung Cancer	Lung	Non-Small Cell Lung Cancer	3.06695	Other
ACH-000736	-0.708503	SNU601	Esophagogastric Adenocarcinoma	Esophagus/Stomach	Esophagogastric Adenocarcinoma	2.54844	Other
ACH-000673	-0.707895	LN443	Diffuse Glioma	CNS/Brain	Diffuse Glioma	2.44095	Other
ACH-000554	-0.706893	UACC893	Invasive Breast Carcinoma	Breast	Invasive Breast Carcinoma	3.47379	Other
ACH-001442	-0.70517	A388	Cutaneous Squamous Cell Carcinoma	Skin	Cutaneous Squamous Cell Carcinoma	3.26003	Other
ACH-002230	-0.704897	D542MG	Diffuse Glioma	CNS/Brain	Diffuse Glioma		Other
ACH-000151	-0.703678	JM1	B-Lymphoblastic Leukemia/Lymphoma	Lymphoid	B-Lymphoblastic Leukemia/Lymphoma	3.38957	Other
ACH-000614	-0.703535	RVH421	Melanoma	Skin	Melanoma	3.27798	Other
ACH-001385	-0.702513	RPMI2650	Head and Neck Squamous Cell Carcinoma	Head and Neck	Head and Neck Squamous Cell Carcinoma	1.8679	Other
ACH-000725	-0.702047	HCC202	Breast Ductal Carcinoma In Situ	Breast	Breast Ductal Carcinoma In Situ	2.66903	Other non-conserving
ACH-000424	-0.698653	TC71	Ewing Sarcoma	Bone	Ewing Sarcoma	2.23266	Other
ACH-000262	-0.696972	UOK101	Renal Cell Carcinoma	Kidney	Renal Cell Carcinoma	2.01436	Other
ACH-000402	-0.692733	BL70	Non-Hodgkin Lymphoma	Lymphoid	Non-Hodgkin Lymphoma	2.08066	Other
ACH-000445	-0.689889	KNS60	Diffuse Glioma	CNS/Brain	Diffuse Glioma	4.04614	Other
ACH-000826	-0.689113	CAL12T	Non-Small Cell Lung Cancer	Lung	Non-Small Cell Lung Cancer	3.24641	Other
ACH-000466	-0.68804	SNU216	Esophagogastric Adenocarcinoma	Esophagus/Stomach	Esophagogastric Adenocarcinoma	2.93923	Other
ACH-001796	-0.684626	95T1000	Liposarcoma	Soft Tissue	Liposarcoma	2.34483	Other non-conserving
ACH-001391	-0.684236	SUM159PT	Invasive Breast Carcinoma	Breast	Invasive Breast Carcinoma	2.72247	Other non-conserving
ACH-001655	-0.682461	SKN	Uterine Sarcoma/Mesenchymal	Uterus	Uterine Sarcoma/Mesenchymal	2.51602	Other
ACH-000183	-0.679322	L363	Non-Hodgkin Lymphoma	Lymphoid	Non-Hodgkin Lymphoma	3.94486	Other
ACH-000460	-0.677544	SNU8	Ovarian Epithelial Tumor	Ovary/Fallopian Tube	Ovarian Epithelial Tumor	2.34767	Other
ACH-000159	-0.677187	OSRC2	Renal Cell Carcinoma	Kidney	Renal Cell Carcinoma	2.76129	Other
ACH-000364	-0.676899	U2OS	Osteosarcoma	Bone	Osteosarcoma	3.0197	Other
ACH-001856	-0.675996	RBE	Intraductal Papillary Neoplasm of the Bile Duct	Biliary Tract	Intraductal Papillary Neoplasm of the Bile Duct	2.01078	Other
ACH-000325	-0.670716	SNU620	Esophagogastric Adenocarcinoma	Esophagus/Stomach	Esophagogastric Adenocarcinoma	2.73552	Other
ACH-000809	-0.668038	KYSE410	Esophageal Squamous Cell Carcinoma	Esophagus/Stomach	Esophageal Squamous Cell Carcinoma	2.75489	Other
ACH-000505	-0.667134	RKN	Leiomyosarcoma	Soft Tissue	Leiomyosarcoma	3.28836	Other
ACH-001834	-0.663113	ICC10	Intraductal Papillary Neoplasm of the Bile Duct	Biliary Tract	Intraductal Papillary Neoplasm of the Bile Duct	3.91934	Other
ACH-001382	-0.660547	PACADD188	Pancreatic Adenocarcinoma	Pancreas	Pancreatic Adenocarcinoma	2.14731	Other
ACH-001619	-0.659218	OCUG1	Intracholecystic Papillary Neoplasm	Biliary Tract	Intracholecystic Papillary Neoplasm	2.85798	Other
ACH-002467	-0.64605	RPE1SS51	Non-Cancerous	Eye	Non-Cancerous	2.0635	Other
ACH-000953	-0.645881	SUPT1	T-Lymphoblastic Leukemia/Lymphoma	Lymphoid	T-Lymphoblastic Leukemia/Lymphoma	4.21335	Other
ACH-001396	-0.645706	SUM52PE	Invasive Breast Carcinoma	Breast	Invasive Breast Carcinoma	2.33628	Other
ACH-001119	-0.644799	MAC2A	Non-Hodgkin Lymphoma	Lymphoid	Non-Hodgkin Lymphoma	1.76977	Other
ACH-000410	-0.641909	SAOS2	Osteosarcoma	Bone	Osteosarcoma	3.1811	Other
ACH-001814	-0.641422	OS252	Osteosarcoma	Bone	Osteosarcoma	2.64155	Other
ACH-002015	-0.639127	MEL285	Ocular Melanoma	Eye	Ocular Melanoma	2.8339	Other
ACH-001554	-0.638451	MEL202	Ocular Melanoma	Eye	Ocular Melanoma	2.51602	Other
ACH-000784	-0.638378	KYSE70	Esophageal Squamous Cell Carcinoma	Esophagus/Stomach	Esophageal Squamous Cell Carcinoma	2.56316	Other non-conserving
ACH-000734	-0.637749	JHH5	Hepatocellular Carcinoma	Liver	Hepatocellular Carcinoma	3.38819	Other
ACH-001054	-0.636142	D458	Embryonal Tumor	CNS/Brain	Embryonal Tumor	2.83996	Other
ACH-000368	-0.635478	SNU1105	Diffuse Glioma	CNS/Brain	Diffuse Glioma	2.58976	Other
ACH-001497	-0.635103	ESO51	Esophagogastric Adenocarcinoma	Esophagus/Stomach	Esophagogastric Adenocarcinoma	2.13422	Other
ACH-000766	-0.634311	NCIH1648	Non-Small Cell Lung Cancer	Lung	Non-Small Cell Lung Cancer	3.84699	Other
ACH-000272	-0.633937	SLR24	Renal Cell Carcinoma	Kidney	Renal Cell Carcinoma	2.22651	Other
ACH-000879	-0.63368	MFE296	Endometrial Carcinoma	Uterus	Endometrial Carcinoma	2.12763	Other
ACH-000271	-0.631652	SUDHL10	Non-Hodgkin Lymphoma	Lymphoid	Non-Hodgkin Lymphoma	2.46989	Other
ACH-000792	-0.629489	BFTC909	Renal Cell Carcinoma	Kidney	Renal Cell Carcinoma	3.26903	Other
ACH-000995	-0.628481	JURKAT	T-Lymphoblastic Leukemia/Lymphoma	Lymphoid	T-Lymphoblastic Leukemia/Lymphoma	3.38819	Other
ACH-001494	-0.627901	EGI1	Intraductal Papillary Neoplasm of the Bile Duct	Biliary Tract	Intraductal Papillary Neoplasm of the Bile Duct	2.97636	Other
ACH-000588	-0.626453	KMS26	Non-Hodgkin Lymphoma	Lymphoid	Non-Hodgkin Lymphoma	3.32769	Other
ACH-000001	-0.625142	NIHOVCAR3	Ovarian Epithelial Tumor	Ovary/Fallopian Tube	Ovarian Epithelial Tumor	3.06695	Other
ACH-001997	-0.624063	ECC2	Intraductal Papillary Neoplasm of the Bile Duct	Biliary Tract	Intraductal Papillary Neoplasm of the Bile Duct	2.68032	Other
ACH-000401	-0.623815	COLO800	Melanoma	Skin	Melanoma	2.99095	Other
ACH-000811	-0.622436	SKOV3	Ovarian Epithelial Tumor	Ovary/Fallopian Tube	Ovarian Epithelial Tumor	2.8679	Other
ACH-000633	-0.620928	FU97	Esophagogastric Adenocarcinoma	Esophagus/Stomach	Esophagogastric Adenocarcinoma	3.38681	Other
ACH-000666	-0.620779	NCIH1355	Non-Small Cell Lung Cancer	Lung	Non-Small Cell Lung Cancer	2.79286	Other
ACH-000406	-0.618388	U937	Acute Myeloid Leukemia	Myeloid	Acute Myeloid Leukemia	2.28688	Other
ACH-000085	-0.617599	T3M4	Pancreatic Adenocarcinoma	Pancreas	Pancreatic Adenocarcinoma	3.55949	Other non-conserving
ACH-000336	-0.617269	OCIAML3	Acute Myeloid Leukemia	Myeloid	Acute Myeloid Leukemia	2.9279	Other
ACH-000359	-0.615873	MG63	Osteosarcoma	Bone	Osteosarcoma	2.46989	Other
ACH-002041	-0.614977	HOTHC	Anaplastic Thyroid Cancer	Thyroid	Anaplastic Thyroid Cancer	2.59694	Other
ACH-000014	-0.614971	HS294T	Melanoma	Skin	Melanoma	3.0635	Other
ACH-000178	-0.614579	HS766T	Pancreatic Adenocarcinoma	Pancreas	Pancreatic Adenocarcinoma	3.96901	Other
ACH-001707	-0.613058	WAOSEL	Non-Hodgkin Lymphoma	Lymphoid	Non-Hodgkin Lymphoma	2	Other
ACH-001664	-0.612118	SNU638	Esophagogastric Adenocarcinoma	Esophagus/Stomach	Esophagogastric Adenocarcinoma	2.54102	Damaging
ACH-000493	-0.612076	SNU423	Hepatocellular Carcinoma	Liver	Hepatocellular Carcinoma	2.74631	Other
ACH-000527	-0.610279	OVISE	Ovarian Epithelial Tumor	Ovary/Fallopian Tube	Ovarian Epithelial Tumor	1.95977	Other
ACH-000041	-0.610135	RDES	Ewing Sarcoma	Bone	Ewing Sarcoma	2.9241	Other
ACH-001520	-0.608212	HG3	B-Lymphoblastic Leukemia/Lymphoma	Lymphoid	B-Lymphoblastic Leukemia/Lymphoma	1.69153	Other
ACH-000522	-0.60716	UMUC3	Bladder Urothelial Carcinoma	Bladder/Urinary Tract	Bladder Urothelial Carcinoma	2.88753	Other
ACH-000537	-0.606686	SNU761	Hepatocellular Carcinoma	Liver	Hepatocellular Carcinoma	3.09592	Other
ACH-000512	-0.604714	INA6	Non-Hodgkin Lymphoma	Lymphoid	Non-Hodgkin Lymphoma	3.21257	Other
ACH-001647	-0.604394	SHI1	Acute Myeloid Leukemia	Myeloid	Acute Myeloid Leukemia	2.39506	Other
ACH-000246	-0.603288	SLR23	Renal Cell Carcinoma	Kidney	Renal Cell Carcinoma	1.99277	Other
ACH-002110	-0.602886	EW1	Ewing Sarcoma	Bone	Ewing Sarcoma		Other
ACH-001451	-0.602729	BOKU	Cervical Squamous Cell Carcinoma	Cervix	Cervical Squamous Cell Carcinoma	3.20006	Other
ACH-000599	-0.601083	PATU8902	Pancreatic Adenocarcinoma	Pancreas	Pancreatic Adenocarcinoma	2.67356	Other
ACH-001137	-0.601006	NCIH1993	Non-Small Cell Lung Cancer	Lung	Non-Small Cell Lung Cancer		Other
ACH-000652	-0.600971	SUIT2	Pancreatic Adenocarcinoma	Pancreas	Pancreatic Adenocarcinoma	2.97085	Other
ACH-001850	-0.600559	G415	Intracholecystic Papillary Neoplasm	Biliary Tract	Intracholecystic Papillary Neoplasm	2.40599	Other
ACH-000092	-0.598276	NCIH2452	Pleural Mesothelioma	Pleura	Pleural Mesothelioma	3.2032	Other
ACH-002463	-0.596704	RPE1SS77	Non-Cancerous	Eye	Non-Cancerous	2.17951	Other
ACH-000704	-0.596639	OAW42	Ovarian Epithelial Tumor	Ovary/Fallopian Tube	Ovarian Epithelial Tumor	1.774	Other
ACH-001539	-0.594887	KML1	Non-Hodgkin Lymphoma	Lymphoid	Non-Hodgkin Lymphoma	2.33056	Other
ACH-001029	-0.594541	CHLA10	Ewing Sarcoma	Bone	Ewing Sarcoma	2.74416	Other
ACH-001039	-0.594525	COLO205	Colorectal Adenocarcinoma	Bowel	Colorectal Adenocarcinoma		Other
ACH-000277	-0.593619	HCC1419	Invasive Breast Carcinoma	Breast	Invasive Breast Carcinoma	3.01078	Other
ACH-000095	-0.593535	D341Med	Embryonal Tumor	CNS/Brain	Embryonal Tumor	2.99095	Other
ACH-001802	-0.593267	LPS853	Liposarcoma	Soft Tissue	Liposarcoma	3.21101	Other
ACH-000970	-0.592459	SNUC5	Colorectal Adenocarcinoma	Bowel	Colorectal Adenocarcinoma	3.17951	Other
ACH-002647	-0.592018	CCC5	Intraductal Papillary Neoplasm of the Bile Duct	Biliary Tract	Intraductal Papillary Neoplasm of the Bile Duct	2.45154	Other
ACH-000022	-0.591491	PATU8988S	Pancreatic Adenocarcinoma	Pancreas	Pancreatic Adenocarcinoma	3.04789	Other
ACH-000341	-0.591095	SKNFI	Neuroblastoma	Peripheral Nervous System	Neuroblastoma	2.65306	Other
ACH-000478	-0.590089	SNU387	Hepatocellular Carcinoma	Liver	Hepatocellular Carcinoma	2.95791	Other
ACH-001804	-0.58877	LPS510	Liposarcoma	Soft Tissue	Liposarcoma	3.55827	Other
ACH-000563	-0.588631	EBC1	Non-Small Cell Lung Cancer	Lung	Non-Small Cell Lung Cancer	4.09339	Other
ACH-000356	-0.588237	MKN45	Esophagogastric Adenocarcinoma	Esophagus/Stomach	Esophagogastric Adenocarcinoma	3.07039	Other
ACH-001392	-0.586643	SUM185PE	Invasive Breast Carcinoma	Breast	Invasive Breast Carcinoma	2.37016	Other
ACH-002042	-0.583569	T3M5	Head and Neck Squamous Cell Carcinoma	Head and Neck	Head and Neck Squamous Cell Carcinoma	2.70929	Other
ACH-000781	-0.583567	NCIH2023	Non-Small Cell Lung Cancer	Lung	Non-Small Cell Lung Cancer	3.14893	Other
ACH-000397	-0.583078	TEN	Endometrial Carcinoma	Uterus	Endometrial Carcinoma	2.50335	Other
ACH-000204	-0.582521	LP1	Non-Hodgkin Lymphoma	Lymphoid	Non-Hodgkin Lymphoma	3.53107	Other
ACH-000767	-0.581846	NCIH526	Lung Neuroendocrine Tumor	Lung	Lung Neuroendocrine Tumor	3.8953	Other
ACH-000249	-0.581524	CL11	Colorectal Adenocarcinoma	Bowel	Colorectal Adenocarcinoma	2.5509	Other
ACH-000200	-0.579479	NMCG1	Diffuse Glioma	CNS/Brain	Diffuse Glioma	2.95606	Other
ACH-000263	-0.575522	KASUMI1	Acute Myeloid Leukemia	Myeloid	Acute Myeloid Leukemia	3.51349	Other
ACH-000108	-0.575047	KP3	Adenosquamous Carcinoma of the Pancreas	Pancreas	Adenosquamous Carcinoma of the Pancreas	3.21568	Other
ACH-001611	-0.574117	NP8	Diffuse Glioma	CNS/Brain	Diffuse Glioma	2.70708	Other
ACH-002672	-0.572821	MAPACHS77	Pancreatic Adenocarcinoma	Pancreas	Pancreatic Adenocarcinoma	3.75809	Other
ACH-001328	-0.572409	A431	Cutaneous Squamous Cell Carcinoma	Skin	Cutaneous Squamous Cell Carcinoma	2.4957	Other
ACH-000273	-0.570833	SF539	Diffuse Glioma	CNS/Brain	Diffuse Glioma	2.64847	Other
ACH-000714	-0.569198	KMS11	Non-Hodgkin Lymphoma	Lymphoid	Non-Hodgkin Lymphoma	3.42358	Other
ACH-000408	-0.567033	TE5	Esophageal Squamous Cell Carcinoma	Esophagus/Stomach	Esophageal Squamous Cell Carcinoma	2.83794	Other
ACH-000671	-0.566173	HUH6	Hepatoblastoma	Liver	Hepatoblastoma	1.68257	Other
ACH-002179	-0.565298	OCUBM	Invasive Breast Carcinoma	Breast	Invasive Breast Carcinoma		Other
ACH-000232	-0.56432	U251MG	Diffuse Glioma	CNS/Brain	Diffuse Glioma	2.50589	Other
ACH-000427	-0.562917	NCIN87	Esophagogastric Adenocarcinoma	Esophagus/Stomach	Esophagogastric Adenocarcinoma	2.43029	Other
ACH-001628	-0.560797	PEA1	Ovarian Epithelial Tumor	Ovary/Fallopian Tube	Ovarian Epithelial Tumor	3.04089	Other
ACH-001509	-0.55909	H357	Head and Neck Squamous Cell Carcinoma	Head and Neck	Head and Neck Squamous Cell Carcinoma	3.27352	Other
ACH-000919	-0.557685	IM95	Esophagogastric Adenocarcinoma	Esophagus/Stomach	Esophagogastric Adenocarcinoma	2.29572	Other
ACH-000344	-0.554225	SNU668	Esophagogastric Adenocarcinoma	Esophagus/Stomach	Esophagogastric Adenocarcinoma	3.35191	Other non-conserving
ACH-001607	-0.55266	NOZ	Intracholecystic Papillary Neoplasm	Biliary Tract	Intracholecystic Papillary Neoplasm	4.05137	Other
ACH-000685	-0.551578	L33	Adenosquamous Carcinoma of the Pancreas	Pancreas	Adenosquamous Carcinoma of the Pancreas	3.35755	Other
ACH-002680	-0.550061	170MGBA	Diffuse Glioma	CNS/Brain	Diffuse Glioma	2.98914	Other
ACH-000820	-0.548723	SW403	Colorectal Adenocarcinoma	Bowel	Colorectal Adenocarcinoma	2.65764	Other
ACH-000370	-0.548584	SNU626	Diffuse Glioma	CNS/Brain	Diffuse Glioma	2.30743	Other
ACH-001498	-0.547127	FARAGE	Non-Hodgkin Lymphoma	Lymphoid	Non-Hodgkin Lymphoma	2.19535	Other
ACH-001558	-0.543332	MERO48A	Pleural Mesothelioma	Pleura	Pleural Mesothelioma	3.01436	Other
ACH-000976	-0.541652	HUCCT1	Intraductal Papillary Neoplasm of the Bile Duct	Biliary Tract	Intraductal Papillary Neoplasm of the Bile Duct	2.46989	Other
ACH-002066	-0.541359	HSSCH2	Nerve Sheath Tumor	Peripheral Nervous System	Nerve Sheath Tumor	3.20633	Other
ACH-000944	-0.54074	NAMALWA	Non-Hodgkin Lymphoma	Lymphoid	Non-Hodgkin Lymphoma	2.43829	Other
ACH-000518	-0.539405	CAL33	Head and Neck Squamous Cell Carcinoma	Head and Neck	Head and Neck Squamous Cell Carcinoma	3.35473	Other
ACH-001028	-0.539085	CHLA06ATRT	Embryonal Tumor	CNS/Brain	Embryonal Tumor	1.05658	Other
ACH-000215	-0.538741	LN382	Diffuse Glioma	CNS/Brain	Diffuse Glioma	2.90881	Other
ACH-000211	-0.53779	DAOY	Embryonal Tumor	CNS/Brain	Embryonal Tumor	2.97453	Other
ACH-000521	-0.535909	NCIH2030	Non-Small Cell Lung Cancer	Lung	Non-Small Cell Lung Cancer	3.21257	Other
ACH-001048	-0.53492	COV504	Ovarian Epithelial Tumor	Ovary/Fallopian Tube	Ovarian Epithelial Tumor	2.55336	Other
ACH-001574	-0.534917	MOLM14	Acute Myeloid Leukemia	Myeloid	Acute Myeloid Leukemia	1.83188	Other
ACH-001375	-0.534311	PACADD119	Pancreatic Adenocarcinoma	Pancreas	Pancreatic Adenocarcinoma	3.29719	Other
ACH-000885	-0.534298	TOV21G	Ovarian Epithelial Tumor	Ovary/Fallopian Tube	Ovarian Epithelial Tumor	2.39506	Other
ACH-000576	-0.533371	KMS27	Non-Hodgkin Lymphoma	Lymphoid	Non-Hodgkin Lymphoma	2.05311	Other
ACH-000889	-0.533213	KMM1	Non-Hodgkin Lymphoma	Lymphoid	Non-Hodgkin Lymphoma	2.29572	Other non-conserving
ACH-001450	-0.533104	BLUE1	Non-Hodgkin Lymphoma	Lymphoid	Non-Hodgkin Lymphoma	2.01436	Other
ACH-000500	-0.532869	SNU46	Head and Neck Squamous Cell Carcinoma	Head and Neck	Head and Neck Squamous Cell Carcinoma	3.34483	Other
ACH-001959	-0.531852	CCLP1	Intraductal Papillary Neoplasm of the Bile Duct	Biliary Tract	Intraductal Papillary Neoplasm of the Bile Duct	2.94298	Other
ACH-001184	-0.529187	SCMCRM2	Rhabdomyosarcoma	Soft Tissue	Rhabdomyosarcoma	2.20477	Other non-conserving
ACH-000381	-0.528002	T84	Colorectal Adenocarcinoma	Bowel	Colorectal Adenocarcinoma	2.19219	Other
ACH-000968	-0.527215	COLO792	Melanoma	Skin	Melanoma	1.43829	Other
ACH-000163	-0.526428	SW579	Head and Neck Squamous Cell Carcinoma	Head and Neck	Head and Neck Squamous Cell Carcinoma	2.75702	Other
ACH-000375	-0.52603	G402	Renal Cell Carcinoma	Kidney	Renal Cell Carcinoma	1.91073	Other
ACH-001336	-0.525667	CASKI	Cervical Squamous Cell Carcinoma	Cervix	Cervical Squamous Cell Carcinoma	3.02857	Other
ACH-000433	-0.525444	CAKI1	Renal Cell Carcinoma	Kidney	Renal Cell Carcinoma	1.93734	Other
ACH-002251	-0.524558	JHU029	Head and Neck Squamous Cell Carcinoma	Head and Neck	Head and Neck Squamous Cell Carcinoma		Other
ACH-000917	-0.524212	TE4	Esophageal Squamous Cell Carcinoma	Esophagus/Stomach	Esophageal Squamous Cell Carcinoma	3.88264	Other
ACH-001374	-0.524084	PA1	Ovarian Germ Cell Tumor	Ovary/Fallopian Tube	Ovarian Germ Cell Tumor	2.62994	Other
ACH-000934	-0.521449	MDAMB361	Invasive Breast Carcinoma	Breast	Invasive Breast Carcinoma	3.12598	Other
ACH-001232	-0.521301	UW228	Embryonal Tumor	CNS/Brain	Embryonal Tumor	3.20633	Other
ACH-002116	-0.520313	EW22	Ewing Sarcoma	Bone	Ewing Sarcoma		Other
ACH-001096	-0.519647	JR	Rhabdomyosarcoma	Soft Tissue	Rhabdomyosarcoma	2.38681	Other
ACH-001551	-0.518695	MCC142	Merkel Cell Carcinoma	Skin	Merkel Cell Carcinoma	2.33914	Other
ACH-002025	-0.518148	TT1TKB	Colorectal Adenocarcinoma	Bowel	Colorectal Adenocarcinoma	2.29866	Other
ACH-001393	-0.516593	SUM190PT	Invasive Breast Carcinoma	Breast	Invasive Breast Carcinoma	1.98185	Other
ACH-001422	-0.516452	WPE1NA22	Prostate Adenocarcinoma	Prostate	Prostate Adenocarcinoma	3.28096	Other
ACH-001668	-0.516139	SUSA	Non-Seminomatous Germ Cell Tumor	Testis	Non-Seminomatous Germ Cell Tumor	1.83188	Other
ACH-001459	-0.513434	C80	Colorectal Adenocarcinoma	Bowel	Colorectal Adenocarcinoma	1.81967	Other
ACH-000856	-0.513216	CAL51	Invasive Breast Carcinoma	Breast	Invasive Breast Carcinoma	3.26153	Other
ACH-000302	-0.511024	SNU1077	Endometrial Carcinoma	Uterus	Endometrial Carcinoma	1.9855	Other
ACH-000495	-0.509859	TUHR4TKB	Renal Cell Carcinoma	Kidney	Renal Cell Carcinoma	2.65764	Other
ACH-001532	-0.508672	JMURTK2	Rhabdoid Cancer	Kidney	Rhabdoid Cancer	1.44361	Other
ACH-000630	-0.508142	YD8	Head and Neck Squamous Cell Carcinoma	Head and Neck	Head and Neck Squamous Cell Carcinoma	3.76553	Other
ACH-000311	-0.507748	NCIH2122	Non-Small Cell Lung Cancer	Lung	Non-Small Cell Lung Cancer	3.30159	Other
ACH-001648	-0.507183	SHMAC4	Prostate Adenocarcinoma	Prostate	Prostate Adenocarcinoma	2.9222	Other
ACH-000903	-0.506755	FTC133	Well-Differentiated Thyroid Cancer	Thyroid	Well-Differentiated Thyroid Cancer	1.28688	Other
ACH-000653	-0.506222	JJN3	Non-Hodgkin Lymphoma	Lymphoid	Non-Hodgkin Lymphoma	3.91169	Other
ACH-001992	-0.50531	ONE58	Pleural Mesothelioma	Pleura	Pleural Mesothelioma	3.95884	Other
ACH-000948	-0.50464	2313287	Esophagogastric Adenocarcinoma	Esophagus/Stomach	Esophagogastric Adenocarcinoma	3.19219	Other
ACH-000150	-0.50434	HCC2935	Non-Small Cell Lung Cancer	Lung	Non-Small Cell Lung Cancer	3.36457	Other
ACH-001528	-0.504071	IHH4	Well-Differentiated Thyroid Cancer	Thyroid	Well-Differentiated Thyroid Cancer	2.70487	Other
ACH-001702	-0.503193	VAESBJ	Epithelioid Sarcoma	Soft Tissue	Epithelioid Sarcoma	2.36457	Other
ACH-000616	-0.502887	HS746T	Esophagogastric Adenocarcinoma	Esophagus/Stomach	Esophagogastric Adenocarcinoma	3.55213	Other
ACH-000070	-0.50026	697	B-Lymphoblastic Leukemia/Lymphoma	Lymphoid	B-Lymphoblastic Leukemia/Lymphoma	2.45943	Other

## Sheet: Table S3
Supplementary Table 3. The frequency at which the Primary.Disease has been recorded
Primary.Disease	frequency
Non-Hodgkin Lymphoma	30
Invasive Breast Carcinoma	20
Diffuse Glioma	19
Renal Cell Carcinoma	17
Esophagogastric Adenocarcinoma	16
Ovarian Epithelial Tumor	15
Colorectal Adenocarcinoma	14
Non-Small Cell Lung Cancer	13
Melanoma	12
Intraductal Papillary Neoplasm of the Bile Duct	10
Head and Neck Squamous Cell Carcinoma	9
Pancreatic Adenocarcinoma	9
B-Lymphoblastic Leukemia/Lymphoma	7
Ewing Sarcoma	7
Acute Myeloid Leukemia	6
Bladder Urothelial Carcinoma	6
Embryonal Tumor	6
Hepatocellular Carcinoma	6
Ocular Melanoma	6
Osteosarcoma	5
Pleural Mesothelioma	5
Prostate Adenocarcinoma	5
Esophageal Squamous Cell Carcinoma	4
Liposarcoma	4
Lung Neuroendocrine Tumor	4
Rhabdomyosarcoma	4
Endometrial Carcinoma	3
Intracholecystic Papillary Neoplasm	3
Non-Cancerous	3
T-Lymphoblastic Leukemia/Lymphoma	3
Adenosquamous Carcinoma of the Pancreas	2
Cervical Squamous Cell Carcinoma	2
Cutaneous Squamous Cell Carcinoma	2
Nerve Sheath Tumor	2
Well-Differentiated Thyroid Cancer	2
Anaplastic Thyroid Cancer	1
Breast Ductal Carcinoma In Situ	1
Epithelioid Sarcoma	1
Extra Gonadal Germ Cell Tumor	1
Hepatoblastoma	1
Hodgkin Lymphoma	1
Leiomyosarcoma	1
Merkel Cell Carcinoma	1
Myeloproliferative Neoplasms	1
Neuroblastoma	1
Non-Seminomatous Germ Cell Tumor	1
Ovarian Germ Cell Tumor	1
Rhabdoid Cancer	1
Uterine Sarcoma/Mesenchymal	1

## Sheet: Table S4
Supplementary Table 4. RICTOR's Top 100 Codependencies with Pearson correlations from DepMap
Gene	Entrez Id	Dataset	Correlation
MAPKAP1	79109	CRISPR (DepMap Public 22Q4+Score, Chronos)	0.733828
MLST8	64223	CRISPR (DepMap Public 22Q4+Score, Chronos)	0.61328
PDPK1	5170	CRISPR (DepMap Public 22Q4+Score, Chronos)	0.475688
AKT1	207	CRISPR (DepMap Public 22Q4+Score, Chronos)	0.441919
MTOR	2475	CRISPR (DepMap Public 22Q4+Score, Chronos)	0.366188
AKT2	208	CRISPR (DepMap Public 22Q4+Score, Chronos)	0.346374
PIK3CB	5291	CRISPR (DepMap Public 22Q4+Score, Chronos)	0.302131
GNB2	2783	CRISPR (DepMap Public 22Q4+Score, Chronos)	0.23482
RPTOR	57521	CRISPR (DepMap Public 22Q4+Score, Chronos)	0.234207
MMD	23531	CRISPR (DepMap Public 22Q4+Score, Chronos)	0.232923
PIK3CD	5293	CRISPR (DepMap Public 22Q4+Score, Chronos)	0.222687
INPPL1	3636	CRISPR (DepMap Public 22Q4+Score, Chronos)	-0.219769
MIOS	54468	CRISPR (DepMap Public 22Q4+Score, Chronos)	0.217582
SEH1L	81929	CRISPR (DepMap Public 22Q4+Score, Chronos)	0.207443
VPS35	55737	CRISPR (DepMap Public 22Q4+Score, Chronos)	0.203662
UBALD1	124402	CRISPR (DepMap Public 22Q4+Score, Chronos)	0.200534
YWHAE	7531	CRISPR (DepMap Public 22Q4+Score, Chronos)	0.200293
RHEB	6009	CRISPR (DepMap Public 22Q4+Score, Chronos)	0.200193
NRP1	8829	CRISPR (DepMap Public 22Q4+Score, Chronos)	-0.199431
WDR59	79726	CRISPR (DepMap Public 22Q4+Score, Chronos)	0.194901
TSC2	7249	CRISPR (DepMap Public 22Q4+Score, Chronos)	-0.193172
TAOK1	57551	CRISPR (DepMap Public 22Q4+Score, Chronos)	-0.191435
INPP5A	3632	CRISPR (DepMap Public 22Q4+Score, Chronos)	0.191343
GNG12	55970	CRISPR (DepMap Public 22Q4+Score, Chronos)	0.190837
GNB1	2782	CRISPR (DepMap Public 22Q4+Score, Chronos)	0.18798
WDR24	84219	CRISPR (DepMap Public 22Q4+Score, Chronos)	0.186429
ARPC4	10093	CRISPR (DepMap Public 22Q4+Score, Chronos)	0.185353
TSC1	7248	CRISPR (DepMap Public 22Q4+Score, Chronos)	-0.183929
DOCK7	85440	CRISPR (DepMap Public 22Q4+Score, Chronos)	0.18225
GNG5	2787	CRISPR (DepMap Public 22Q4+Score, Chronos)	0.18052
BCL10	8915	CRISPR (DepMap Public 22Q4+Score, Chronos)	0.176356
ELOVL1	64834	CRISPR (DepMap Public 22Q4+Score, Chronos)	0.175219
FRYL	285527	CRISPR (DepMap Public 22Q4+Score, Chronos)	-0.174848
PDCL	5082	CRISPR (DepMap Public 22Q4+Score, Chronos)	0.173214
CCDC130	81576	CRISPR (DepMap Public 22Q4+Score, Chronos)	-0.17289
PRKAR1A	5573	CRISPR (DepMap Public 22Q4+Score, Chronos)	0.171262
FERMT2	10979	CRISPR (DepMap Public 22Q4+Score, Chronos)	0.170899
PIK3CA	5290	CRISPR (DepMap Public 22Q4+Score, Chronos)	0.170877
NF2	4771	CRISPR (DepMap Public 22Q4+Score, Chronos)	-0.167904
BCL6	604	CRISPR (DepMap Public 22Q4+Score, Chronos)	0.167503
THOC7	80145	CRISPR (DepMap Public 22Q4+Score, Chronos)	-0.166426
RRAS2	22800	CRISPR (DepMap Public 22Q4+Score, Chronos)	0.165229
MOB4	25843	CRISPR (DepMap Public 22Q4+Score, Chronos)	0.164568
REX1BD	55049	CRISPR (DepMap Public 22Q4+Score, Chronos)	-0.163335
CENPA	1058	CRISPR (DepMap Public 22Q4+Score, Chronos)	-0.163156
PI4KB	5298	CRISPR (DepMap Public 22Q4+Score, Chronos)	0.162265
ITGB5	3693	CRISPR (DepMap Public 22Q4+Score, Chronos)	0.161852
CLCC1	23155	CRISPR (DepMap Public 22Q4+Score, Chronos)	0.161223
RAPGEF6	51735	CRISPR (DepMap Public 22Q4+Score, Chronos)	0.158462
NDUFS3	4722	CRISPR (DepMap Public 22Q4+Score, Chronos)	-0.158277
PPM1F	9647	CRISPR (DepMap Public 22Q4+Score, Chronos)	-0.157417
PMF1	11243	CRISPR (DepMap Public 22Q4+Score, Chronos)	-0.157099
PAPOLA	10914	CRISPR (DepMap Public 22Q4+Score, Chronos)	0.15691
DDIT4	54541	CRISPR (DepMap Public 22Q4+Score, Chronos)	-0.156585
ATG101	60673	CRISPR (DepMap Public 22Q4+Score, Chronos)	-0.156566
ACTR3	10096	CRISPR (DepMap Public 22Q4+Score, Chronos)	0.156525
KEAP1	9817	CRISPR (DepMap Public 22Q4+Score, Chronos)	-0.155462
ZYX	7791	CRISPR (DepMap Public 22Q4+Score, Chronos)	0.155412
ARPC3	10094	CRISPR (DepMap Public 22Q4+Score, Chronos)	0.155251
ARPC2	10109	CRISPR (DepMap Public 22Q4+Score, Chronos)	0.155187
PTPA	5524	CRISPR (DepMap Public 22Q4+Score, Chronos)	-0.154959
C7	730	CRISPR (DepMap Public 22Q4+Score, Chronos)	0.154824
LATS2	26524	CRISPR (DepMap Public 22Q4+Score, Chronos)	-0.153901
SNRNP25	79622	CRISPR (DepMap Public 22Q4+Score, Chronos)	-0.153898
ZRANB1	54764	CRISPR (DepMap Public 22Q4+Score, Chronos)	0.153137
ZFP36L2	678	CRISPR (DepMap Public 22Q4+Score, Chronos)	-0.152246
TRIO	7204	CRISPR (DepMap Public 22Q4+Score, Chronos)	0.15165
ITGAV	3685	CRISPR (DepMap Public 22Q4+Score, Chronos)	0.150804
DAB2	1601	CRISPR (DepMap Public 22Q4+Score, Chronos)	0.149476
NCAPH2	29781	CRISPR (DepMap Public 22Q4+Score, Chronos)	0.147964
UFM1	51569	CRISPR (DepMap Public 22Q4+Score, Chronos)	0.147884
BCAR1	9564	CRISPR (DepMap Public 22Q4+Score, Chronos)	0.147429
RASSF8	11228	CRISPR (DepMap Public 22Q4+Score, Chronos)	0.146655
PTK2	5747	CRISPR (DepMap Public 22Q4+Score, Chronos)	0.146592
ANKLE1	126549	CRISPR (DepMap Public 22Q4+Score, Chronos)	-0.146128
LPAR1	1902	CRISPR (DepMap Public 22Q4+Score, Chronos)	0.146054
GOLGA7	51125	CRISPR (DepMap Public 22Q4+Score, Chronos)	-0.145825
CPD	1362	CRISPR (DepMap Public 22Q4+Score, Chronos)	0.14509
CWC22	57703	CRISPR (DepMap Public 22Q4+Score, Chronos)	0.142906
STX18	53407	CRISPR (DepMap Public 22Q4+Score, Chronos)	0.142471
SNRNP27	11017	CRISPR (DepMap Public 22Q4+Score, Chronos)	-0.142334
PLXNA1	5361	CRISPR (DepMap Public 22Q4+Score, Chronos)	-0.14202
PHOX2B	8929	CRISPR (DepMap Public 22Q4+Score, Chronos)	-0.142003
SLC45A2	51151	CRISPR (DepMap Public 22Q4+Score, Chronos)	0.141599
RNF146	81847	CRISPR (DepMap Public 22Q4+Score, Chronos)	-0.14156
RPL30	6156	CRISPR (DepMap Public 22Q4+Score, Chronos)	0.141481
SIPA1	6494	CRISPR (DepMap Public 22Q4+Score, Chronos)	-0.141453
AMOTL2	51421	CRISPR (DepMap Public 22Q4+Score, Chronos)	-0.141435
DIPK2A	205428	CRISPR (DepMap Public 22Q4+Score, Chronos)	0.141203
YBX1	4904	CRISPR (DepMap Public 22Q4+Score, Chronos)	0.14118
KCTD5	54442	CRISPR (DepMap Public 22Q4+Score, Chronos)	-0.140423
TBC1D5	9779	CRISPR (DepMap Public 22Q4+Score, Chronos)	0.14009
YPEL1	29799	CRISPR (DepMap Public 22Q4+Score, Chronos)	-0.139347
VCL	7414	CRISPR (DepMap Public 22Q4+Score, Chronos)	0.139054
MEIOB	254528	CRISPR (DepMap Public 22Q4+Score, Chronos)	0.138727
UBE2G2	7327	CRISPR (DepMap Public 22Q4+Score, Chronos)	0.138302
PAX8	7849	CRISPR (DepMap Public 22Q4+Score, Chronos)	0.138194
LAMTOR1	55004	CRISPR (DepMap Public 22Q4+Score, Chronos)	0.138134
MAPK14	1432	CRISPR (DepMap Public 22Q4+Score, Chronos)	0.138107
DDX41	51428	CRISPR (DepMap Public 22Q4+Score, Chronos)	-0.134877

## Sheet: Table S5
Supplementary Table 5. RICTOR expression and immune infiltration scores in pan-cancer.
Cancer type	StromalScore		ImmuneScore		ESTIMATEScore
	pearson_R	pearson_P	pearson_R	pearson_P	pearson_R	pearson_P
TCGA-GBM(N=152)	-0.240582	0.00283031	-0.250998	0.00181436	-0.255988	0.00145665
TCGA-GBMLGG(N=656)	-0.560046	1.97001e-55	-0.465748	1.25258e-36	-0.517165	3.78826e-46
TCGA-LGG(N=504)	-0.390547	8.21587e-20	-0.29008	3.14964e-11	-0.337989	6.20534e-15
TCGA-CESC(N=291)	-0.0965526	0.100214	-0.138811	0.0178257	-0.135982	0.0203143
TCGA-LUAD(N=500)	-0.0585244	0.191386	-0.165936	0.000193756	-0.125708	0.0048769
TCGA-COAD(N=282)	0.342576	3.48454e-09	0.243982	3.44722e-05	0.313284	7.72504e-08
TCGA-COADREAD(N=373)	0.337817	2.07823e-11	0.233548	5.14933e-06	0.306223	1.54098e-09
TCGA-LAML(N=149)	0.028199	0.732816	-0.117168	0.154714	-0.0627855	0.446841
TCGA-BRCA(N=1077)	0.0994517	0.00108277	-0.148248	1.02637e-06	-0.0430175	0.158319
TCGA-ESCA(N=181)	0.143884	0.0533078	-0.002346	0.974996	0.0759934	0.309261
TCGA-STES(N=569)	-0.0530785	0.206149	-0.146939	0.000437392	-0.108934	0.00930868
TCGA-SARC(N=258)	-0.219938	0.000371919	-0.25926	2.48203e-05	-0.26184	2.04506e-05
TCGA-KIRP(N=285)	-0.171409	0.00370194	-0.281381	1.38419e-06	-0.251342	1.75792e-05
TCGA-KIPAN(N=878)	0.170318	3.84165e-07	-0.0076121	0.821795	0.0805344	0.0169958
TCGA-STAD(N=388)	0.0481567	0.344115	-0.0313786	0.537734	0.0085106	0.86729
TCGA-PRAD(N=495)	0.0914966	0.0418716	0.00615349	0.891377	0.0482567	0.283921
TCGA-UCEC(N=178)	-0.0325625	0.666111	-0.243883	0.001036	-0.177035	0.0180788
TCGA-HNSC(N=517)	0.0892736	0.0424573	-0.0186842	0.67168	0.0364001	0.408848
TCGA-KIRC(N=528)	0.0627217	0.150084	-0.0874944	0.044478	-0.0261574	0.548687
TCGA-LUSC(N=491)	-0.0744121	0.0995698	-0.177323	7.7973e-05	-0.136904	0.00236427
TCGA-THYM(N=118)	0.0448692	0.62948	-0.176328	0.0561308	-0.107497	0.246598
TCGA-LIHC(N=363)	-0.0230391	0.66175	-0.0931792	0.0762224	-0.0689464	0.189981
TCGA-THCA(N=503)	-0.00561369	0.900057	-0.1524	0.000604637	-0.102769	0.0211536
TCGA-MESO(N=85)	-0.166228	0.128396	-0.30453	0.00460136	-0.288126	0.0074948
TCGA-READ(N=91)	0.318934	0.00206121	0.21818	0.037743	0.289712	0.00534497
TCGA-SKCM-M(N=351)	-0.0652819	0.222467	-0.0495884	0.354293	-0.0595854	0.265562
TCGA-SKCM(N=452)	-0.0644663	0.17125	-0.0527892	0.262719	-0.0613268	0.193108
TCGA-PAAD(N=177)	0.146608	0.0515103	0.0599737	0.427802	0.108101	0.152085
TCGA-OV(N=417)	-0.0532064	0.278359	-0.149264	0.00224275	-0.115121	0.0186922
TCGA-TGCT(N=132)	0.0518218	0.555109	-0.00798266	0.927617	0.0157836	0.857446
TCGA-PCPG(N=177)	-0.430996	2.11886e-09	-0.399836	3.51758e-08	-0.43934	9.50106e-10
TCGA-SKCM-P(N=101)	-0.264856	0.00743704	-0.288352	0.0034533	-0.304577	0.00195627
TCGA-UVM(N=79)	-0.0859958	0.451112	0.0956128	0.401917	0.041457	0.716784
TCGA-UCS(N=56)	0.103179	0.449212	-0.212042	0.116674	-0.0755266	0.580104
TCGA-BLCA(N=405)	-0.129602	0.00902409	-0.060953	0.220951	-0.101528	0.0411349
TCGA-ACC(N=77)	-0.183123	0.110907	-0.155703	0.17631	-0.174308	0.129479
TCGA-KICH(N=65)	-0.171718	0.17139	-0.241782	0.0523334	-0.219545	0.0788851
TCGA-CHOL(N=36)	-0.125476	0.465896	-0.230055	0.17708	-0.201467	0.238689
TCGA-DLBC(N=46)	0.14519	0.335679	0.486125	0.000614499	0.384379	0.00835407
